# Supplementary material for: Molecular composition of clouds: a comparison between samples collected at tropical (Réunion Island, France) and mid-north (Puy de Dôme, France) latitudes
Source: Copernicus journal article supplement (doi:10.5194/acp-24-5567-2024), 2024-05-15
Supplement: Supplementary file 1 [file acp-24-5567-2024-supplement.pdf]

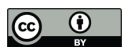

*Supplement of*

**Molecular composition of clouds: a comparison between samples collected at tropical (Réunion Island, France) and mid-north (Puy de Dôme, France) latitudes**

**Lucas Pailler et al.**

*Correspondence to:* Laurent Deguillaume ([laurent.deguillaume@uca.fr](mailto:laurent.deguillaume@uca.fr)) and Angelica Bianco ([a.bianco@opgc.fr](mailto:a.bianco@opgc.fr))

The copyright of individual parts of the supplement might differ from the article licence.

The Supplementary information is composed by:

- Formula used in this study
- Five tables
- Eight Figures
- References

## S.1 Methodology for the calculation of relative number occurrence and relative weighted occurrence

The relative number of occurrence is calculated as the number of MFs in a specific group divided by the total number of assigned MFs and multiplied by 100, as reported in equation 1 for CHO compounds.

$$(S1): \text{relative number}_{CHO} = \frac{\#MFs_{CHO}}{\#MFs_{Total}} \times 100$$

The relative weighted occurrence was calculated as the sum of the absolute intensities of a specific group, divided by the sum of the absolute intensities of all the assigned MFs and multiplied by 100, as reported in equation 2 for CHO compounds:

$$(S2): \text{relative weighted}_{CHO} = \frac{\sum \text{absolute intensity}_{CHO}}{\sum \text{absolute intensity}_{Total}} \times 100$$

## S.2 Formulas used in this study:

*Determination of Aromaticity index (AI):* AI is determined as the ratio between  $DBE_{AI(mod)}$  and the number of carbon atoms C, as described by Melendez-Perez et al. (Melendez-Perez et al., 2016)

$$(S3): DBE_{AI(mod)} = 1 + \frac{1}{2} \times (2C - H - O - 2S - N)$$

$$(S4): AI = \frac{DBE_{AI(mod)}}{C} = (1 + \frac{1}{2} \times (2C - H - O - 2S - N)) / C$$

And if  $DBE_{AI} \leq 0$ , then  $AI = 0$ . AI measures C-C double bond density and also integrates the contribution of  $\pi$ -bonds by heteroatoms.

### *CHO Index*

$$(S5): CHO_{Index} = \frac{2 \times O - H}{C}$$

*Determination of carbon oxidation state (OSC):* the carbon oxidation state (OSC) is an ideal metric to measure the degree of oxidation of organic species in the atmosphere and it is calculated using Equation S3 and S4

$$(S6): OSC = \sum_i OS_i \times \frac{n_i}{n_c}$$

$$(S7): OSC = 2 \times \frac{O}{C} - \frac{H}{C} - 3 \frac{N}{C} - 2 \frac{S}{C}$$

This parameter was used to investigate the carbon oxidation state in organic aerosol by Kroll et al. (Kroll et al., 2011)

**Table S1:** Ancillary measurements performed on REU samples and reported in Dominutti et al. 2022.

| Sampling characteristics            |              | <b>R8</b> | <b>R9</b> | <b>R10B</b> |
|-------------------------------------|--------------|-----------|-----------|-------------|
| <i>DOC [mgC L<sup>-1</sup>]</i>     | TC           | 9.3       | 9.3       | 18.1        |
|                                     | IC           | 1.5       | 3.5       | 1.2         |
|                                     | TOC          | 7.9       | 5.8       | 17.0        |
| <i>Carboxylic acids [μM]</i>        | Acetic       | 31.3      | 16.8      | 29.8        |
|                                     | Formic       | 9.1       | 10.0      | 12.2        |
| <i>Dicarboxylic acids [μM]</i>      | Oxalic       | 1.6       | 0.3       | 0.4         |
|                                     | Lactic       | 4.3       | 0.6       | 1.0         |
|                                     | Malonic      | 1.1       | 0.7       | 1.7         |
|                                     | Succinic     | 0.7       | 0.6       | 1.3         |
|                                     | Glutaric     | 0.1       | 0.1       | 0.1         |
| <i>Carbonyls [μM]</i>               | Formaldehyde | 2.9       | 1.0       | 0.9         |
|                                     | Acetaldehyde | 0.3       | 0.2       | 0.3         |
|                                     | Acetone      | 0.2       | 0.2       | 0.6         |
| <i>VOC<br/>[ng mL<sup>-1</sup>]</i> | Benzene      | 0.3       | 0.1       | 0.2         |
|                                     | Toluene      | 0.1       | 0.2       | 0.1         |
|                                     | Ethylbenzene | 0.1       | 0.2       | 0.0         |
|                                     | m+p-xylene   | 0.1       | 0.0       | 0.0         |
|                                     | o-xylene     | 0.0       | 0.0       | 0.0         |

**Table S2:** Average, standard deviation and t-tests of OSC collected at Reunion, and winter, summer and autumn at PUY.

|              | mean  | std dev | t test with Reunion | Significantly different? |
|--------------|-------|---------|---------------------|--------------------------|
| mean winter  | -0.97 | 0.56    | 3.36E-93            | Yes                      |
| mean summer  | -0.60 | 0.58    | 7.99E-03            | Yes                      |
| mean autumn  | -0.75 | 0.65    | 0.64                | No                       |
| mean Reunion | -0.77 | 0.55    |                     |                          |

**Table S3:** Classes of water soluble organic compounds defined by Kroll et al. (2011).

|                                                  | #C  |     | OSC  |      |
|--------------------------------------------------|-----|-----|------|------|
|                                                  | min | max | min  | max  |
| Hydrocarbon-like organic aerosol (HOA)           | 18  | 30  | -2   | -1   |
| Biomass burning organic aerosol (BBOA)           | 7   | 22  | -1.5 | -0.5 |
| Semivolatile oxidized organic aerosol (SV-OOA)   | 5   | 17  | -0.5 | 0.5  |
| Low-volatility oxidized organic aerosol (LV-OOA) | 4   | 12  | 0.2  | 1    |

**Table S4:** Molecular formulas of SOA tracers of isoprene, alpha and beta pinene, limonene, alpha and gamma terpinene, terpinolene, beta caryophyllene in cloud water collected at REU (yellow) and at PUY (blue). The table reports also molecular formula attributed to nitroaromatics, brown carbon, aminoacids and sugars. The intensity of formulas identified in cloud samples is reported in light blue in the corresponding cell. NM: not measured.

| Samples                                                           | R8      | R9 | R10B | 02/03/2019 | 15/03/2019 | 02/10/2019 | 22/10/2019 | 17/07/2020 | 03/11/2020 | 08/10/2020 |
|-------------------------------------------------------------------|---------|----|------|------------|------------|------------|------------|------------|------------|------------|
| <b>Organosulfate formation from isoprene</b>                      |         |    |      |            |            |            |            |            |            |            |
| <b>Surratt et al., 2008</b>                                       |         |    |      |            |            |            |            |            |            |            |
| C4H8O7S                                                           | NM      | NM | NM   | NM         | NM         | NM         | NM         | NM         | NM         | NM         |
| C5H8O7S                                                           | 6.1E+06 | NM | NM   | NM         | NM         | NM         | NM         | NM         | NM         | 1.3E+07    |
| C5H11NO8S                                                         | NM      | NM | NM   | NM         | NM         | NM         | NM         | NM         | NM         | NM         |
| C5H11NO9S                                                         | NM      | NM | NM   | NM         | NM         | NM         | NM         | NM         | NM         | NM         |
| C8H14O10S                                                         | NM      | NM | NM   | NM         | NM         | NM         | NM         | NM         | NM         | 1.6E+07    |
| C5H10N2O11S                                                       | NM      | NM | NM   | NM         | NM         | NM         | NM         | NM         | NM         | NM         |
| C10H20O10S                                                        | NM      | NM | NM   | NM         | NM         | NM         | NM         | NM         | NM         | 2.3E+07    |
| C10H22O10S                                                        | NM      | NM | NM   | NM         | NM         | NM         | NM         | NM         | NM         | NM         |
| C8H13NO12S                                                        | NM      | NM | NM   | NM         | NM         | NM         | NM         | NM         | NM         | NM         |
| C15H32O13S                                                        | NM      | NM | NM   | NM         | NM         | NM         | NM         | NM         | NM         | NM         |
| <b>Products of isoprene ozonolysis in the presence of sulfate</b> |         |    |      |            |            |            |            |            |            |            |
| <b>Riva et al., 2016 a</b>                                        |         |    |      |            |            |            |            |            |            |            |
| C3H6O5S                                                           | NM      | NM | NM   | NM         | NM         | NM         | NM         | NM         | NM         | NM         |
| C3H6O6S                                                           | NM      | NM | NM   | NM         | NM         | NM         | NM         | NM         | NM         | NM         |
| C5H10O7S                                                          | NM      | NM | NM   | NM         | NM         | NM         | NM         | NM         | NM         | 1.6E+07    |
| C5H12O7S                                                          | NM      | NM | NM   | NM         | NM         | NM         | NM         | NM         | NM         | NM         |
| C4H8O6S                                                           | NM      | NM | NM   | NM         | NM         | NM         | NM         | NM         | NM         | NM         |

| Samples                                          | R8      | R9      | R10B    | 02/03/2019 | 15/03/2019 | 02/10/2019 | 22/10/2019 | 17/07/2020 | 03/11/2020 | 08/10/2020 |
|--------------------------------------------------|---------|---------|---------|------------|------------|------------|------------|------------|------------|------------|
| C5H12O6S                                         | NM      | NM      | NM      | NM         | NM         | NM         | NM         | NM         | NM         | NM         |
| C5H8O5S                                          | 4.0E+06 | 1.3E+06 | NM      | NM         | NM         | NM         | NM         | NM         | NM         | 5.9E+06    |
| C5H10O5S                                         | 4.0E+06 | 2.1E+06 | 9.6E+05 | 4.4E+06    | NM         | NM         | NM         | NM         | NM         | 2.8E+07    |
| C5H10O6S                                         | 1.1E+07 | 3.5E+06 | 1.9E+06 | NM         | 1.1E+07    | NM         | NM         | NM         | NM         | 2.4E+07    |
| C8H10O4S                                         | NM      | NM      | NM      | NM         | NM         | NM         | NM         | NM         | NM         | 1.1E+07    |
| C6H12O7S                                         | 3.6E+06 | NM      | 1.3E+06 | NM         | NM         | NM         | NM         | NM         | NM         | 3.6E+07    |
| C9H14O6S                                         | 5.8E+06 | 4.1E+06 | 2.0E+06 | NM         | 5.8E+06    | NM         | NM         | NM         | NM         | 7.1E+07    |
| C9H16O7S                                         | 3.8E+07 | NM      | 7.4E+06 | 5.6E+06    | NM         | 9.3E+06    | NM         | 9.0E+06    | 7.7E+06    | 1.7E+07    |
| C10H20O9S                                        | 2.8E+06 | NM      | 1.2E+06 | NM         | NM         | NM         | NM         | NM         | NM         | 2.4E+07    |
| C13H12O10S                                       | NM      | NM      | NM      | NM         | NM         | NM         | NM         | NM         | NM         | NM         |
| C15H16O12S                                       | NM      | NM      | NM      | NM         | NM         | NM         | NM         | NM         | NM         | NM         |
| <b>Oxidation of isoprene</b>                     |         |         |         |            |            |            |            |            |            |            |
| <b>Riva et al., 2016 b</b>                       |         |         |         |            |            |            |            |            |            |            |
| C4H6O3                                           | NM      | NM      | NM      | NM         | NM         | NM         | NM         | NM         | NM         | NM         |
| C4H6O4                                           | 1.2E+06 | NM      | NM      | NM         | NM         | 2.8E+07    | NM         | NM         | NM         | NM         |
| C4H8O4                                           | 9.7E+05 | NM      | NM      | NM         | NM         | NM         | NM         | NM         | NM         | NM         |
| C5H8O5                                           | NM      | 9.8E+05 | 1.3E+06 | NM         | NM         | 7.3E+06    | NM         | NM         | NM         | NM         |
| C5H8O6S                                          | NM      | NM      | NM      | NM         | NM         | NM         | NM         | NM         | NM         | 1.3E+07    |
| C5H12O8S                                         | NM      | NM      | NM      | NM         | NM         | NM         | NM         | NM         | NM         | NM         |
| C8H14O7S                                         | 1.5E+07 | 6.6E+06 | 3.6E+06 | NM         | NM         | 9.8E+06    | NM         | 4.7E+06    | NM         | 1.5E+08    |
| C7H14O8S                                         | 1.6E+06 | NM      | NM      | NM         | NM         | NM         | NM         | NM         | NM         | 3.2E+07    |
| C6H14O9S                                         | NM      | NM      | NM      | NM         | NM         | NM         | NM         | NM         | NM         | NM         |
| C8H16O8S                                         | 3.6E+06 | 1.8E+06 | 2.2E+06 | NM         | NM         | NM         | NM         | NM         | NM         | 4.6E+07    |
| C10H18O7S                                        | 1.9E+07 | 1.7E+07 | 5.8E+06 | 1.5E+07    | 7.3E+06    | NM         | NM         | NM         | NM         | 2.6E+08    |
| C10H18O8S                                        | 2.3E+07 | 1.4E+07 | NM      | 7.5E+06    | 1.6E+07    | 7.3E+06    | NM         | 5.4E+06    | NM         | 1.8E+08    |
| C10H20O8S                                        | 9.7E+06 | 7.2E+06 | NM      | 3.2E+07    | 6.7E+06    | NM         | NM         | NM         | NM         | 3.4E+07    |
| C10H20O10S                                       | NM      | NM      | NM      | NM         | NM         | NM         | NM         | NM         | NM         | 2.3E+07    |
| C10H22O10S                                       | NM      | NM      | NM      | NM         | NM         | NM         | NM         | NM         | NM         | NM         |
| C12H24O11S                                       | NM      | NM      | NM      | NM         | NM         | NM         | NM         | NM         | NM         | 1.1E+07    |
| C15H28O11S                                       | 2.7E+06 | 2.1E+06 | NM      | NM         | NM         | NM         | NM         | NM         | NM         | NM         |
| C15H28O12S                                       | NM      | NM      | NM      | NM         | NM         | NM         | NM         | NM         | NM         | NM         |
| C15H30O12S                                       | NM      | NM      | NM      | NM         | NM         | NM         | NM         | NM         | NM         | NM         |
| C15H30O13S                                       | NM      | NM      | NM      | NM         | NM         | NM         | NM         | NM         | NM         | NM         |
| C20H40O15S                                       | NM      | NM      | NM      | NM         | NM         | NM         | NM         | NM         | NM         | NM         |
| <b>Organosulfate formation from alpha-pinene</b> |         |         |         |            |            |            |            |            |            |            |
| <b>Surratt et al., 2008</b>                      |         |         |         |            |            |            |            |            |            |            |
| C7H12O6S                                         | 7.8E+06 | 4.9E+06 | 1.8E+06 | NM         | NM         | 4.6E+06    | NM         | NM         | NM         | 1.1E+08    |
| C5H8O8S                                          | NM      | NM      | NM      | NM         | NM         | NM         | NM         | NM         | NM         | NM         |
| C8H14O6S                                         | 1.8E+07 | 9.8E+06 | 4.8E+06 | 4.9E+06    | 5.8E+06    | 1.0E+07    | NM         | NM         | NM         | 1.5E+08    |
| C10H16O5S                                        | 6.1E+06 | 5.1E+06 | NM      | 1.1E+07    | 8.0E+06    | NM         | NM         | NM         | NM         | 3.0E+07    |
| C10H18O5S                                        | 4.1E+06 | 4.6E+06 | 1.3E+06 | 1.3E+07    | 6.6E+06    | NM         | NM         | NM         | NM         | 1.3E+08    |

| Samples                                         | R8      | R9      | R10B    | 02/03/2019 | 15/03/2019 | 02/10/2019 | 22/10/2019 | 17/07/2020 | 03/11/2020 | 08/10/2020 |
|-------------------------------------------------|---------|---------|---------|------------|------------|------------|------------|------------|------------|------------|
| C10H18O6S                                       | 2.3E+07 | 1.7E+07 | 6.5E+06 | 1.5E+07    | 2.0E+07    | NM         | NM         | NM         | NM         | 1.8E+08    |
| C10H16O7S                                       | 1.4E+07 | 1.2E+07 | 4.7E+06 | 7.8E+06    | 5.2E+06    | NM         | NM         | NM         | NM         | 4.3E+08    |
| C10H18O7S                                       | 1.9E+07 | 1.7E+07 | 5.8E+06 | 1.5E+07    | 7.3E+06    | NM         | NM         | NM         | NM         | 2.6E+08    |
| C10H17NO7S                                      | NM      | NM      | NM      | 9.3E+06    | 7.9E+06    | NM         | NM         | NM         | NM         | 4.5E+08    |
| C10H18O8S                                       | 2.3E+07 | 1.4E+07 | NM      | 7.5E+06    | 1.6E+07    | 7.3E+06    | NM         | 5.4E+06    | NM         | 1.8E+08    |
| C10H17NO8S                                      | NM      | 2.5E+06 | NM      | NM         | NM         | NM         | NM         | NM         | NM         | 1.7E+08    |
| C10H16N2O9S                                     | NM      | NM      | NM      | NM         | NM         | NM         | NM         | NM         | NM         | NM         |
| C10H17NO10S                                     | 6.4E+06 | 6.9E+06 | NM      | NM         | NM         | NM         | NM         | NM         | NM         | 9.3E+08    |
| C10H16N2O10S                                    | NM      | NM      | NM      | NM         | NM         | NM         | NM         | NM         | NM         | 1.9E+07    |
| <b>Organosulfate formation from beta-pinene</b> |         |         |         |            |            |            |            |            |            |            |
| <b>Surratt et al., 2008</b>                     |         |         |         |            |            |            |            |            |            |            |
| C10H18O6S                                       | 2.3E+07 | 1.7E+07 | 6.5E+06 | 1.5E+07    | 2.0E+07    | NM         | NM         | NM         | NM         | 1.8E+08    |
| C10H16O6S                                       | 9.9E+06 | 7.1E+06 | 3.1E+06 | 1.0E+07    | NM         | NM         | NM         | NM         | NM         | 1.2E+08    |
| C10H16O7S                                       | 1.4E+07 | 1.2E+07 | 4.7E+06 | 7.8E+06    | 5.2E+06    | NM         | NM         | NM         | NM         | 4.3E+08    |
| C10H18O7S                                       | 1.9E+07 | 1.7E+07 | 5.8E+06 | 1.5E+07    | 7.3E+06    | NM         | NM         | NM         | NM         | 2.6E+08    |
| C10H20O7S                                       | 1.6E+07 | 1.2E+07 | 5.9E+06 | 1.3E+07    | NM         | NM         | NM         | NM         | NM         | 6.0E+07    |
| C10H17NO7S                                      | NM      | NM      | NM      | 9.3E+06    | 7.9E+06    | NM         | NM         | NM         | NM         | 4.5E+08    |
| C10H17NO8S                                      | NM      | 2.5E+06 | NM      | NM         | NM         | NM         | NM         | NM         | NM         | 1.7E+08    |
| C10H17NO9S                                      | NM      | 2.4E+06 | NM      | 6.6E+06    | NM         | NM         | NM         | NM         | NM         | 3.7E+08    |
| C10H17NO10S                                     | 6.4E+06 | 6.9E+06 | NM      | NM         | NM         | NM         | NM         | NM         | NM         | 9.3E+08    |
| <b>Alpha pinene dimer esters</b>                |         |         |         |            |            |            |            |            |            |            |
| <b>Kristensen et al., 2016</b>                  |         |         |         |            |            |            |            |            |            |            |
| C15H26O6                                        | NM      | NM      | NM      | NM         | NM         | 1.5E+07    | NM         | NM         | NM         | NM         |
| C16H24O6                                        | NM      | NM      | NM      | 1.2E+08    | 6.5E+07    | 1.1E+07    | 6.1E+06    | NM         | 6.7E+06    | 4.7E+07    |
| C16H26O6                                        | NM      | NM      | NM      | 1.6E+08    | 8.1E+07    | 1.4E+07    | 4.6E+06    | 7.7E+06    | NM         | 5.5E+07    |
| C15H24O7                                        | NM      | NM      | NM      | 1.6E+08    | 1.0E+08    | 3.3E+07    | 7.9E+06    | 1.5E+07    | 7.5E+06    | 1.1E+08    |
| C16H24O7                                        | NM      | NM      | NM      | 8.8E+07    | 6.4E+07    | 2.2E+07    | 4.6E+06    | 9.5E+06    | 5.4E+06    | 6.5E+07    |
| C16H26O7                                        | NM      | NM      | NM      | 1.4E+08    | 8.4E+07    | 2.2E+07    | 5.2E+06    | 1.1E+07    | 4.8E+06    | 7.9E+07    |
| C15H24O8                                        | NM      | NM      | NM      | 6.6E+07    | 5.1E+07    | 3.5E+07    | 5.6E+06    | 1.9E+07    | 5.1E+06    | 1.6E+08    |
| C19H28O5                                        | NM      | NM      | NM      | 5.3E+07    | 2.7E+07    | NM         | NM         | NM         | NM         | 1.0E+07    |
| C19H30O5                                        | NM      | NM      | NM      | 4.7E+07    | 2.9E+07    | NM         | NM         | NM         | NM         | 1.1E+07    |
| C18H28O6                                        | NM      | NM      | NM      | 9.6E+07    | 5.5E+07    | 6.9E+06    | NM         | NM         | 4.5E+06    | 3.9E+07    |
| C17H26O7                                        | NM      | NM      | NM      | 1.4E+08    | 8.0E+07    | 1.8E+07    | 6.0E+06    | 6.9E+06    | 1.1E+07    | 6.9E+07    |
| C16H24O8                                        | NM      | NM      | NM      | 5.0E+07    | 4.0E+07    | 2.8E+07    | 6.3E+06    | 1.2E+07    | 6.7E+06    | 1.1E+08    |
| C17H28O7                                        | NM      | NM      | NM      | 1.5E+08    | 7.6E+07    | 1.5E+07    | 6.0E+06    | 7.7E+06    | 6.0E+06    | 5.3E+07    |
| C19H30O6                                        | 1.1E+07 | 1.2E+07 | 1.1E+07 | 5.8E+07    | 4.2E+07    | 5.6E+06    | NM         | NM         | NM         | 1.7E+07    |
| C18H28O7                                        | NM      | NM      | NM      | 8.4E+07    | 5.4E+07    | 1.2E+07    | 5.2E+06    | NM         | 6.7E+06    | 4.6E+07    |
| C17H26O8                                        | NM      | NM      | NM      | 1.1E+07    | 4.5E+07    | 2.0E+07    | NM         | 9.1E+06    | 9.6E+06    | 7.5E+07    |
| C17H28O8                                        | NM      | NM      | NM      | 8.6E+07    | 4.9E+07    | 1.5E+07    | NM         | 7.2E+06    | NM         | 7.9E+07    |
| C16H26O9                                        | 1.3E+07 | 8.0E+06 | 5.6E+06 | NM         | NM         | 3.0E+07    | NM         | NM         | NM         | NM         |
| C19H28O7                                        | NM      | NM      | NM      | 8.1E+07    | 4.9E+07    | 8.6E+06    | NM         | NM         | 7.0E+06    | 3.8E+07    |

| Samples                                             | R8      | R9      | R10B    | 02/03/2019 | 15/03/2019 | 02/10/2019 | 22/10/2019 | 17/07/2020 | 03/11/2020 | 08/10/2020 |
|-----------------------------------------------------|---------|---------|---------|------------|------------|------------|------------|------------|------------|------------|
| C19H30O7                                            | NM      | NM      | NM      | 7.4E+07    | 6.1E+07    | 2.7E+07    | 6.3E+06    | NM         | 1.6E+07    | 2.8E+07    |
| C18H28O8                                            | 1.7E+07 | 1.5E+07 | 9.8E+06 | 1.1E+07    | 4.4E+07    | 1.5E+07    | NM         | 9.8E+06    | 4.7E+06    | 5.6E+07    |
| C17H26O9                                            | 1.6E+07 | 9.5E+06 | 7.3E+06 | 2.6E+07    | 2.3E+07    | 2.0E+07    | 4.8E+06    | 9.7E+06    | 4.9E+06    | 8.9E+07    |
| C16H26O10                                           | 6.9E+06 | 3.0E+06 | 2.9E+06 | 6.9E+06    | 5.3E+06    | 8.7E+06    | NM         | NM         | NM         | 8.4E+07    |
| C19H28O8                                            | 1.6E+07 | 1.4E+07 | 9.4E+06 | 5.1E+07    | 3.2E+07    | 1.0E+07    | NM         | NM         | 5.2E+06    | 4.5E+07    |
| C19H30O8                                            | 1.4E+07 | 1.5E+07 | 1.0E+07 | 7.4E+07    | 4.0E+07    | 1.2E+07    | 4.7E+06    | NM         | NM         | 4.5E+07    |
| C18H28O9                                            | 1.4E+07 | 1.0E+07 | 6.9E+06 | 5.8E+06    | 2.4E+07    | 1.5E+07    | 5.4E+06    | 9.4E+06    | NM         | 6.7E+07    |
| C19H28O9                                            | 1.3E+07 | 8.3E+06 | 6.6E+06 | 3.0E+07    | 2.1E+07    | 1.2E+07    | NM         | 5.6E+06    | 4.8E+06    | 4.1E+07    |
| C18H30O10                                           | 5.6E+06 | 3.7E+06 | 2.5E+06 | 1.1E+07    | 7.2E+06    | 7.1E+06    | NM         | NM         | NM         | 5.3E+07    |
| <b>Alpha pinene products in aerosol samples</b>     |         |         |         |            |            |            |            |            |            |            |
| <b>Kourtchev et al., 2013</b>                       |         |         |         |            |            |            |            |            |            |            |
| C8H12O5                                             | 2.5E+08 | 1.2E+08 | 1.6E+08 | NM         | NM         | 1.3E+08    | NM         | NM         | NM         | NM         |
| C8H12O6                                             | NM      | NM      | NM      | NM         | NM         | 9.7E+07    | NM         | NM         | NM         | NM         |
| <b>Organosulfate formation from limonene</b>        |         |         |         |            |            |            |            |            |            |            |
| <b>Surratt et al., 2008</b>                         |         |         |         |            |            |            |            |            |            |            |
| C7H12O7S                                            | NM      | NM      | NM      | NM         | NM         | 4.9E+06    | NM         | 1.2E+07    | NM         | 1.3E+08    |
| C9H14O6S                                            | 5.8E+06 | 4.1E+06 | 2.0E+06 | NM         | 5.8E+06    | NM         | NM         | NM         | NM         | 7.1E+07    |
| C9H16O6S                                            | 1.6E+07 | 1.1E+07 | 5.4E+06 | 9.5E+06    | 8.6E+06    | 7.6E+06    | NM         | 6.0E+06    | NM         | 2.1E+08    |
| C9H16O7S                                            | 3.8E+07 | NM      | 7.4E+06 | 5.6E+06    | NM         | 9.3E+06    | NM         | 9.0E+06    | 7.7E+06    | 1.7E+07    |
| C10H16O7S                                           | 1.4E+07 | 1.2E+07 | 4.7E+06 | 7.8E+06    | 5.2E+06    | NM         | NM         | NM         | NM         | 4.3E+08    |
| C10H18O7S                                           | 1.9E+07 | 1.7E+07 | 5.8E+06 | 1.5E+07    | 7.3E+06    | NM         | NM         | NM         | NM         | 2.6E+08    |
| C9H15NO8S                                           | NM      | 1.3E+06 | NM      | 7.0E+06    | NM         | NM         | NM         | NM         | NM         | 1.3E+08    |
| C9H15NO9S                                           | 5.6E+06 | 3.9E+06 | 1.7E+06 | NM         | NM         | NM         | NM         | NM         | NM         | 1.9E+08    |
| C10H17NO9S                                          | NM      | 2.4E+06 | NM      | 6.6E+06    | NM         | NM         | NM         | NM         | NM         | 3.7E+08    |
| C10H19NO9S                                          | 5.6E+06 | 4.3E+06 | NM      | 9.1E+06    | NM         | NM         | NM         | NM         | NM         | 2.7E+08    |
| C9H17NO10S                                          | 4.3E+06 | 4.2E+06 | NM      | NM         | NM         | NM         | NM         | NM         | NM         | 1.0E+08    |
| C10H18N2O11S                                        | NM      | NM      | NM      | NM         | NM         | NM         | NM         | NM         | NM         | 3.9E+08    |
| C10H18N2O12S                                        | NM      | NM      | NM      | NM         | NM         | NM         | NM         | NM         | NM         | NM         |
| <b>Limonene products in aerosol samples</b>         |         |         |         |            |            |            |            |            |            |            |
| <b>Kourtchev et al., 2013</b>                       |         |         |         |            |            |            |            |            |            |            |
| C9H14O4                                             | 1.4E+08 | 1.0E+08 | 7.0E+07 | NM         | NM         | 1.0E+08    | NM         | NM         | NM         | NM         |
| <b>Oxydation products</b>                           |         |         |         |            |            |            |            |            |            |            |
| <b>Finessi et al. 2014</b>                          |         |         |         |            |            |            |            |            |            |            |
| C7H10O4                                             | NM      | NM      | NM      | 1.4E+07    | 1.7E+07    | 4.7E+07    | NM         | 3.5E+07    | 7.6E+06    | 6.4E+08    |
| C8H12O4                                             | NM      | NM      | NM      | NM         | NM         | 1.2E+08    | NM         | NM         | NM         | NM         |
| C10H16O4                                            | 1.2E+08 | 8.9E+07 | 5.4E+07 | NM         | NM         | 6.4E+07    | NM         | NM         | NM         | NM         |
| C8H12O4                                             | NM      | NM      | NM      | NM         | NM         | 1.2E+08    | NM         | NM         | NM         | NM         |
| C9H14O4                                             | 1.4E+08 | 1.0E+08 | 7.0E+07 | NM         | NM         | 1.0E+08    | NM         | NM         | NM         | NM         |
| C10H16O3                                            | NM      | NM      | NM      | NM         | NM         | 3.2E+07    | NM         | NM         | NM         | NM         |
| C19H18O7                                            | NM      | NM      | NM      | NM         | NM         | NM         | NM         | NM         | NM         | 9.7E+06    |
| <b>Organosulfate formation from alpha-terpinene</b> |         |         |         |            |            |            |            |            |            |            |



| Samples                                             | R8      | R9      | R10B    | 02/03/2019 | 15/03/2019 | 02/10/2019 | 22/10/2019 | 17/07/2020 | 03/11/2020 | 08/10/2020 |
|-----------------------------------------------------|---------|---------|---------|------------|------------|------------|------------|------------|------------|------------|
| <b>Surratt et al., 2008</b>                         |         |         |         |            |            |            |            |            |            |            |
| C8H14O7S                                            | 1.5E+07 | 6.6E+06 | 3.6E+06 | NM         | NM         | 9.8E+06    | NM         | 4.7E+06    | NM         | 1.5E+08    |
| C10H18O6S                                           | 2.3E+07 | 1.7E+07 | 6.5E+06 | 1.5E+07    | 2.0E+07    | NM         | NM         | NM         | NM         | 1.8E+08    |
| C10H16O7S                                           | 1.4E+07 | 1.2E+07 | 4.7E+06 | 7.8E+06    | 5.2E+06    | NM         | NM         | NM         | NM         | 4.3E+08    |
| C10H18O7S                                           | 1.9E+07 | 1.7E+07 | 5.8E+06 | 1.5E+07    | 7.3E+06    | NM         | NM         | NM         | NM         | 2.6E+08    |
| C9H16O8S                                            | 7.6E+06 | 4.2E+06 | 3.2E+06 | NM         | 5.7E+06    | NM         | NM         | 5.8E+06    | NM         | 1.3E+08    |
| C10H20O7S                                           | 1.6E+07 | 1.2E+07 | 5.9E+06 | 1.3E+07    | NM         | NM         | NM         | NM         | NM         | 6.0E+07    |
| C10H17NO7S                                          | NM      | NM      | NM      | 9.3E+06    | 7.9E+06    | NM         | NM         | NM         | NM         | 4.5E+08    |
| C10H18O8S                                           | 2.3E+07 | 1.4E+07 | NM      | 7.5E+06    | 1.6E+07    | 7.3E+06    | NM         | 5.4E+06    | NM         | 1.8E+08    |
| C10H17NO8S                                          | NM      | 2.5E+06 | NM      | NM         | NM         | NM         | NM         | NM         | NM         | 1.7E+08    |
| C10H17NO10S                                         | 6.4E+06 | 6.9E+06 | NM      | NM         | NM         | NM         | NM         | NM         | NM         | 9.3E+08    |
| C10H18N2O11S                                        | NM      | NM      | NM      | NM         | NM         | NM         | NM         | NM         | NM         | 3.9E+08    |
| <b>Organosulfate formation from gamma-terpinene</b> |         |         |         |            |            |            |            |            |            |            |
| <b>Surratt et al., 2008</b>                         |         |         |         |            |            |            |            |            |            |            |
| C10H16O7S                                           | 1.4E+07 | 1.2E+07 | 4.7E+06 | 7.8E+06    | 5.2E+06    | NM         | NM         | NM         | NM         | 4.3E+08    |
| C10H17NO8S                                          | NM      | 2.5E+06 | NM      | NM         | NM         | NM         | NM         | NM         | NM         | 1.7E+08    |
| C10H18N2O11S                                        | NM      | NM      | NM      | NM         | NM         | NM         | NM         | NM         | NM         | 3.9E+08    |
| <b>Organosulfate formation from terpinolene</b>     |         |         |         |            |            |            |            |            |            |            |
| <b>Surratt et al., 2008</b>                         |         |         |         |            |            |            |            |            |            |            |
| C9H14O6S                                            | 5.8E+06 | 4.1E+06 | 2.0E+06 | NM         | 5.8E+06    | NM         | NM         | NM         | NM         | 7.1E+07    |
| C10H18O5S                                           | 4.1E+06 | 4.6E+06 | 1.3E+06 | 1.3E+07    | 6.6E+06    | NM         | NM         | NM         | NM         | 1.3E+08    |
| C10H18O6S                                           | 2.3E+07 | 1.7E+07 | 6.5E+06 | 1.5E+07    | 2.0E+07    | NM         | NM         | NM         | NM         | 1.8E+08    |
| C10H18O7S                                           | 1.9E+07 | 1.7E+07 | 5.8E+06 | 1.5E+07    | 7.3E+06    | NM         | NM         | NM         | NM         | 2.6E+08    |
| C10H20O7S                                           | 1.6E+07 | 1.2E+07 | 5.9E+06 | 1.3E+07    | NM         | NM         | NM         | NM         | NM         | 6.0E+07    |
| C10H17NO7S                                          | NM      | NM      | NM      | 9.3E+06    | 7.9E+06    | NM         | NM         | NM         | NM         | 4.5E+08    |
| C10H18O8S                                           | 2.3E+07 | 1.4E+07 | NM      | 7.5E+06    | 1.6E+07    | 7.3E+06    | NM         | 5.4E+06    | NM         | 1.8E+08    |
| C10H17NO9S                                          | NM      | 2.4E+06 | NM      | 6.6E+06    | NM         | NM         | NM         | NM         | NM         | 3.7E+08    |
| C10H18N2O11S                                        | NM      | NM      | NM      | NM         | NM         | NM         | NM         | NM         | NM         | 3.9E+08    |
| <b>Products of <math>\beta</math>-caryophyllene</b> |         |         |         |            |            |            |            |            |            |            |
| <b>Chan et al., 2011</b>                            |         |         |         |            |            |            |            |            |            |            |
| C9H14O4                                             | 1.4E+08 | 1.0E+08 | 7.0E+07 | NM         | NM         | 1.0E+08    | NM         | NM         | NM         | NM         |
| C10H16O5                                            | 2.5E+08 | 1.5E+08 | 1.0E+08 | NM         | NM         | 1.6E+08    | NM         | NM         | NM         | NM         |
| C14H20O4                                            | NM      | NM      | NM      | 5.5E+07    | 2.4E+07    | NM         | NM         | NM         | NM         | 1.7E+07    |
| C15H24O3                                            | NM      | NM      | NM      | 3.5E+07    | 1.7E+07    | NM         | NM         | NM         | NM         | 9.7E+06    |
| C14H22O4                                            | NM      | NM      | NM      | NM         | NM         | 8.6E+06    | NM         | NM         | NM         | NM         |
| C13H20O5                                            | NM      | NM      | NM      | 3.9E+08    | 2.1E+08    | 3.5E+07    | 1.1E+07    | 1.6E+07    | 1.1E+07    | 1.3E+08    |
| C14H24O4                                            | NM      | NM      | NM      | NM         | NM         | 5.8E+06    | NM         | NM         | NM         | NM         |
| C15H22O4                                            | NM      | NM      | NM      | 7.1E+07    | 3.2E+07    | NM         | NM         | NM         | NM         | 1.4E+07    |
| C14H20O5                                            | NM      | NM      | NM      | 1.0E+08    | 6.2E+07    | 1.7E+07    | NM         | 6.4E+06    | 5.8E+06    | 4.8E+07    |
| C15H24O4                                            | NM      | NM      | NM      | NM         | NM         | 5.3E+06    | NM         | NM         | NM         | NM         |
| C14H22O5                                            | NM      | NM      | NM      | NM         | NM         | 2.3E+07    | NM         | NM         | NM         | NM         |

| Samples                        | R8      | R9      | R10B    | 02/03/2019 | 15/03/2019 | 02/10/2019 | 22/10/2019 | 17/07/2020 | 03/11/2020 | 08/10/2020 |
|--------------------------------|---------|---------|---------|------------|------------|------------|------------|------------|------------|------------|
| C15H26O4                       | NM      | NM      | NM      | 1.3E+08    | 4.5E+07    | NM         | NM         | NM         | NM         | 1.8E+07    |
| C14H24O5                       | NM      | NM      | NM      | 2.3E+08    | 1.1E+08    | 1.4E+07    | 6.3E+06    | 6.6E+06    | 7.3E+06    | 4.6E+07    |
| C15H24O5                       | NM      | NM      | NM      | 2.6E+08    | 1.0E+08    | 1.2E+07    | 5.7E+06    | NM         | NM         | 5.0E+07    |
| C14H22O6                       | NM      | NM      | NM      | 2.0E+08    | 1.4E+08    | 4.3E+07    | 9.4E+06    | 2.1E+07    | 1.2E+07    | 9.2E+07    |
| C15H26O5                       | NM      | NM      | NM      | 2.5E+08    | 8.6E+07    | 7.5E+06    | NM         | NM         | NM         | 3.8E+07    |
| C17H26O4                       | NM      | NM      | NM      | NM         | NM         | 1.5E+07    | NM         | NM         | NM         | NM         |
| C13H28O8                       | NM      | NM      | NM      | NM         | NM         | NM         | NM         | NM         | NM         | NM         |
| C15H22O7                       | NM      | NM      | NM      | 8.2E+07    | 6.0E+07    | 3.6E+07    | 5.7E+06    | 1.4E+07    | 7.5E+06    | 8.9E+07    |
| C16H26O6                       | NM      | NM      | NM      | 1.6E+08    | 8.1E+07    | 1.4E+07    | 4.6E+06    | 7.7E+06    | NM         | 5.5E+07    |
| C14H24O8                       | 2.2E+07 | 1.3E+07 | 1.1E+07 | 3.1E+07    | 2.4E+07    | 1.0E+07    | NM         | 8.7E+06    | 4.7E+06    | 1.1E+08    |
| C17H28O6                       | NM      | NM      | NM      | NM         | NM         | 9.1E+06    | NM         | NM         | NM         | NM         |
| C16H26O7                       | NM      | NM      | NM      | 1.4E+08    | 8.4E+07    | 2.2E+07    | 5.2E+06    | 1.1E+07    | 4.8E+06    | 7.9E+07    |
| C17H30O6                       | NM      | NM      | NM      | NM         | NM         | 5.4E+06    | NM         | NM         | NM         | NM         |
| C10H13NO3                      | 9.5E+06 | 4.0E+06 | 2.9E+06 | 7.9E+06    | 7.2E+06    | 5.2E+06    | NM         | NM         | NM         | 1.6E+07    |
| C16H27NO7                      | 8.5E+06 | 6.1E+06 | 4.9E+06 | 2.8E+07    | 3.3E+07    | 7.5E+06    | NM         | 4.7E+06    | NM         | 3.7E+07    |
| C15H25NO8                      | 7.2E+06 | 6.7E+06 | 5.7E+06 | 1.3E+07    | 1.0E+07    | 7.6E+06    | NM         | NM         | NM         | 6.4E+07    |
| C14H23NO9                      | 3.8E+06 | 2.5E+06 | 1.7E+06 | 6.0E+06    | 5.3E+06    | 1.1E+07    | NM         | NM         | NM         | 6.6E+07    |
| C15H27NO8                      | 3.8E+06 | 3.0E+06 | 3.0E+06 | 7.8E+06    | NM         | NM         | NM         | NM         | NM         | 3.4E+07    |
| C13H22N2O9                     | 2.0E+06 | NM      | NM      | NM         | NM         | NM         | NM         | NM         | NM         | 1.9E+07    |
| C15H25NO9                      | 4.1E+06 | 2.9E+06 | 2.1E+06 | NM         | NM         | 8.6E+06    | NM         | NM         | NM         | 6.1E+07    |
| C16H29NO8                      | 3.7E+06 | 2.0E+06 | 2.1E+06 | NM         | NM         | NM         | NM         | NM         | NM         | 2.9E+07    |
| C17H29NO8                      | 4.5E+06 | 4.0E+06 | 2.3E+06 | 1.3E+07    | 1.0E+07    | 6.9E+06    | NM         | NM         | NM         | 3.7E+07    |
| C24H38N2O12                    | NM      | NM      | NM      | NM         | NM         | NM         | NM         | NM         | NM         | NM         |
| C9H16O6S                       | 1.6E+07 | 1.1E+07 | 5.4E+06 | 9.5E+06    | 8.6E+06    | 7.6E+06    | NM         | 6.0E+06    | NM         | 2.1E+08    |
| C14H24O5S                      | NM      | NM      | NM      | NM         | NM         | NM         | NM         | NM         | NM         | NM         |
| C15H26O5S                      | NM      | 5.7E+06 | 4.4E+06 | NM         |
| C14H23O6S                      | NM      | NM      | NM      | NM         | NM         | NM         | NM         | NM         | NM         | NM         |
| C14H22O7S                      | 5.0E+06 | 6.2E+06 | 2.4E+06 | 1.4E+07    | 7.3E+06    | NM         | NM         | NM         | NM         | 1.7E+07    |
| C15H26O6S                      | 1.5E+07 | 1.8E+07 | 9.7E+06 | 3.9E+07    | 1.2E+07    | NM         | NM         | NM         | NM         | NM         |
| C15H24O7S                      | 1.4E+07 | 2.1E+07 | 9.6E+06 | 4.6E+07    | 1.3E+07    | NM         | NM         | NM         | NM         | 1.9E+07    |
| C14H22O8S                      | 8.3E+06 | 6.7E+06 | 3.5E+06 | 1.0E+07    | 6.0E+06    | NM         | NM         | NM         | NM         | 2.6E+07    |
| C15H26O7S                      | 2.0E+07 | 3.5E+07 | 1.3E+07 | 6.1E+07    | 2.2E+07    | NM         | NM         | NM         | NM         | 1.8E+07    |
| C14H24O8S                      | 1.3E+07 | 1.4E+07 | 6.8E+06 | 1.9E+07    | 1.3E+07    | NM         | NM         | NM         | NM         | 2.9E+07    |
| C15H24O8S                      | 1.1E+07 | 1.3E+07 | 6.2E+06 | 2.9E+07    | 1.1E+07    | NM         | NM         | NM         | NM         | 3.0E+07    |
| C16H28O7S                      | NM      | 4.9E+06 | NM      | 1.4E+07    | 7.2E+06    | NM         | NM         | NM         | NM         | 1.0E+07    |
| C16H28O8S                      | 5.8E+06 | 7.7E+06 | NM      | 1.7E+07    | 9.3E+06    | NM         | NM         | NM         | NM         | 1.4E+07    |
| C15H25NO7S                     | 6.3E+06 | 1.5E+07 | 5.7E+06 | 2.2E+07    | 7.8E+06    | NM         | NM         | NM         | NM         | 6.0E+06    |
| C14H24NO9S                     | NM      | NM      | NM      | NM         | NM         | NM         | NM         | NM         | NM         | NM         |
| <b>Nitroaromatic compounds</b> |         |         |         |            |            |            |            |            |            |            |
| <b>Zhang et al., 2013</b>      |         |         |         |            |            |            |            |            |            |            |
| C6H5NO3                        | NM      | NM      | NM      | 6.4E+06    | 4.4E+06    | 5.8E+06    | NM         | NM         | NM         | 1.3E+07    |
| C8H9NO3                        | 8.5E+06 | 4.0E+06 | NM      | 5.6E+06    | 7.5E+06    | 4.1E+06    | NM         | NM         | NM         | 1.3E+07    |

| Samples                                        | R8      | R9      | R10B    | 02/03/2019 | 15/03/2019 | 02/10/2019 | 22/10/2019 | 17/07/2020 | 03/11/2020 | 08/10/2020 |
|------------------------------------------------|---------|---------|---------|------------|------------|------------|------------|------------|------------|------------|
| C7H7NO3                                        | 1.3E+06 | NM      | NM      | 4.8E+06    | 5.0E+06    | 4.5E+06    | NM         | NM         | NM         | 9.8E+06    |
| C7H7NO4                                        | 3.1E+06 | 2.8E+06 | 1.5E+06 | 6.7E+06    | NM         | NM         | NM         | NM         | NM         | 2.3E+07    |
| C7H6N2O5                                       | NM      | NM      | NM      | NM         | NM         | NM         | NM         | NM         | NM         | 4.2E+07    |
| C9H11NO3                                       | 1.3E+07 | 4.6E+06 | 5.9E+06 | 2.5E+07    | 1.8E+07    | 1.3E+07    | 5.6E+06    | NM         | NM         | 2.6E+07    |
| C10H13NO3                                      | 9.5E+06 | 4.0E+06 | 2.9E+06 | 7.9E+06    | 7.2E+06    | 5.2E+06    | NM         | NM         | NM         | 1.6E+07    |
| C11H15NO3                                      | NM      | NM      | NM      | 1.5E+07    | 6.3E+06    | NM         | NM         | NM         | NM         | 9.9E+06    |
| C16H9NO3                                       | NM      | NM      | NM      | NM         | NM         | NM         | NM         | NM         | NM         | NM         |
| C6H5NO4                                        | NM      | NM      | NM      | NM         | NM         | NM         | NM         | NM         | NM         | 1.2E+07    |
| C7H5NO5                                        | 9.7E+06 | 6.2E+06 | 3.1E+06 | NM         | 6.4E+06    | 4.3E+06    | NM         | NM         | NM         | 2.0E+07    |
| C10H7NO3                                       | 1.7E+06 | 1.4E+06 | 1.1E+06 | 1.4E+07    | 1.3E+07    | NM         | NM         | NM         | NM         | 8.5E+06    |
| C12H9NO4                                       | NM      | NM      | NM      | NM         | NM         | NM         | NM         | NM         | NM         | NM         |
| C14H13NO3                                      | 1.5E+06 | NM      | NM      | NM         | NM         | NM         | NM         | NM         | NM         | NM         |
| <b>Brown carbon assigned molecular formula</b> |         |         |         |            |            |            |            |            |            |            |
| <b>Lin et al., 2018</b>                        |         |         |         |            |            |            |            |            |            |            |
| C8H8O3                                         | 2.6E+06 | NM      | 1.8E+06 | 2.1E+07    | 3.7E+07    | 1.0E+07    | NM         | NM         | NM         | 3.4E+07    |
| C9H6O4                                         | 2.4E+06 | 2.0E+06 | NM      | NM         | NM         | NM         | NM         | NM         | NM         | 2.3E+07    |
| C6H5NO5                                        | 1.2E+06 | NM      | NM      | NM         | NM         | NM         | NM         | NM         | NM         | 5.7E+06    |
| C8H10O5S                                       | NM      | NM      | NM      | NM         | NM         | NM         | NM         | NM         | NM         | NM         |
| C10H8O4                                        | 7.9E+06 | 5.7E+06 | 2.8E+06 | 8.3E+06    | 7.3E+06    | NM         | NM         | NM         | NM         | 3.5E+07    |
| C9H10O3                                        | 2.1E+07 | 1.6E+07 | 2.0E+07 | NM         | NM         | 5.7E+06    | NM         | NM         | NM         | NM         |
| C12H12O4                                       | 6.2E+06 | 5.2E+06 | NM      | 1.8E+07    | 1.5E+07    | NM         | NM         | NM         | NM         | 2.7E+07    |
| C6H5NO4                                        | NM      | NM      | NM      | NM         | NM         | NM         | NM         | NM         | NM         | 1.2E+07    |
| C10H10O3                                       | 8.8E+06 | 7.0E+06 | 4.5E+06 | 2.4E+07    | 1.8E+07    | NM         | NM         | NM         | NM         | 2.6E+07    |
| C11H12O4                                       | 1.6E+07 | 1.2E+07 | 7.3E+06 | 3.2E+07    | 4.2E+07    | 1.1E+07    | 6.6E+06    | 5.7E+06    | 4.6E+06    | 3.7E+07    |
| C8H7NO4                                        | NM      | 3.2E+06 | 2.3E+06 | 4.3E+06    | NM         | NM         | NM         | NM         | NM         | 1.4E+07    |
| C7H7NO4                                        | 3.1E+06 | 2.8E+06 | 1.5E+06 | 6.7E+06    | NM         | NM         | NM         | NM         | NM         | 2.3E+07    |
| C8H9NO5                                        | 3.7E+06 | 1.8E+06 | 1.6E+06 | NM         | NM         | 4.4E+06    | NM         | NM         | NM         | 4.2E+07    |
| C8H9NO4                                        | 6.4E+06 | 3.3E+06 | 2.2E+06 | 5.9E+06    | 6.1E+06    | 5.0E+06    | NM         | NM         | NM         | 2.4E+07    |
| C10H11NO5                                      | NM      | NM      | NM      | 1.4E+07    | 1.1E+07    | 5.9E+06    | NM         | NM         | NM         | 3.1E+07    |
| C11H13NO5                                      | NM      | NM      | NM      | 1.8E+07    | 1.2E+07    | 7.6E+06    | NM         | NM         | NM         | 4.3E+07    |
| C18H16O8                                       | NM      | NM      | NM      | NM         | NM         | NM         | NM         | NM         | NM         | 8.8E+06    |
| C10H7NO3                                       | 1.7E+06 | 1.4E+06 | 1.1E+06 | 1.4E+07    | 1.3E+07    | NM         | NM         | NM         | NM         | 8.5E+06    |
| C9H11NO4                                       | 1.4E+07 | 5.4E+06 | 3.9E+06 | 5.9E+06    | 6.9E+06    | 4.2E+06    | NM         | NM         | NM         | 5.3E+07    |
| C10H13NO4                                      | 1.5E+07 | 6.5E+06 | 4.5E+06 | 1.5E+07    | 1.1E+07    | 5.6E+06    | NM         | NM         | NM         | 4.4E+07    |
| C13H13NO4                                      | 3.0E+06 | NM      | NM      | 7.6E+06    | 5.8E+06    | NM         | NM         | NM         | NM         | 5.0E+06    |
| C11H13NO4                                      | NM      | NM      | NM      | 2.7E+07    | 2.0E+07    | 7.0E+06    | NM         | NM         | NM         | 3.9E+07    |
| C17H14O4                                       | NM      | NM      | NM      | NM         | NM         | NM         | NM         | NM         | NM         | NM         |
| C15H14O4                                       | 2.3E+06 | 2.4E+06 | NM      | 4.7E+06    | NM         | NM         | NM         | NM         | NM         | 4.9E+06    |
| C17H10O                                        | NM      | NM      | NM      | NM         | NM         | NM         | NM         | NM         | NM         | NM         |
| C16H10O                                        | NM      | NM      | NM      | NM         | NM         | NM         | NM         | NM         | NM         | NM         |
| C19H10O                                        | NM      | NM      | NM      | NM         | NM         | NM         | NM         | NM         | NM         | NM         |
| C21H12O                                        | NM      | NM      | NM      | NM         | NM         | NM         | NM         | NM         | NM         | NM         |

| Samples                                        | R8      | R9      | R10B    | 02/03/2019 | 15/03/2019 | 02/10/2019 | 22/10/2019 | 17/07/2020 | 03/11/2020 | 08/10/2020 |
|------------------------------------------------|---------|---------|---------|------------|------------|------------|------------|------------|------------|------------|
| C21H10O2                                       | NM      | NM      | NM      | NM         | NM         | NM         | NM         | NM         | NM         | NM         |
| <b>Brown carbon assigned molecular formula</b> |         |         |         |            |            |            |            |            |            |            |
| <b>Hapsari Budisulistiorini et al., 2017</b>   |         |         |         |            |            |            |            |            |            |            |
| C10H10O4                                       | 2.8E+07 | 2.1E+07 | 1.3E+07 | NM         | NM         | 1.1E+07    | NM         | NM         | NM         | NM         |
| C9H6O3                                         | NM      | NM      | NM      | NM         | NM         | NM         | NM         | NM         | NM         | NM         |
| C8H8O3                                         | 2.6E+06 | NM      | 1.8E+06 | 2.1E+07    | 3.7E+07    | 1.0E+07    | NM         | NM         | NM         | 3.4E+07    |
| C6H12O4S                                       | NM      | NM      | 1.5E+06 | NM         | NM         | NM         | NM         | NM         | NM         | 1.6E+07    |
| C10H8O4                                        | 7.9E+06 | 5.7E+06 | 2.8E+06 | 8.3E+06    | 7.3E+06    | NM         | NM         | NM         | NM         | 3.5E+07    |
| C9H8O3                                         | 1.4E+07 | 9.7E+06 | 5.1E+06 | 2.5E+07    | 2.5E+07    | NM         | NM         | NM         | NM         | 2.9E+07    |
| C9H10O4                                        | NM      | NM      | NM      | 2.2E+07    | 2.2E+07    | 7.3E+06    | NM         | 4.7E+06    | NM         | 5.5E+07    |
| C11H12O5                                       | 2.2E+07 | 1.4E+07 | 9.7E+06 | 2.3E+07    | 1.9E+07    | 1.2E+07    | NM         | NM         | 5.3E+06    | 6.5E+07    |
| C6H6O3                                         | NM      | NM      | NM      | NM         | NM         | NM         | NM         | NM         | NM         | 1.1E+07    |
| C13H16O4                                       | 1.1E+07 | 1.4E+07 | 1.0E+07 | 3.5E+07    | 2.7E+07    | 5.1E+06    | NM         | NM         | NM         | 1.6E+07    |
| C13H14O6S                                      | NM      | NM      | NM      | NM         | NM         | NM         | NM         | NM         | NM         | 1.1E+07    |
| C12H14O7S                                      | NM      | NM      | NM      | 5.8E+06    | NM         | NM         | NM         | NM         | NM         | 2.2E+07    |
| C18H20O5S                                      | NM      | NM      | NM      | NM         | NM         | NM         | NM         | NM         | NM         | 1.3E+07    |
| C23H22O7                                       | NM      | NM      | NM      | NM         | NM         | NM         | NM         | NM         | NM         | NM         |
| C15H8O5                                        | NM      | NM      | NM      | NM         | NM         | NM         | NM         | NM         | NM         | NM         |
| C6H5NO3                                        | NM      | NM      | NM      | 6.4E+06    | 4.4E+06    | 5.8E+06    | NM         | NM         | NM         | 1.3E+07    |
| C7H7NO3                                        | 1.3E+06 | NM      | NM      | 4.8E+06    | 5.0E+06    | 4.5E+06    | NM         | NM         | NM         | 9.8E+06    |
| C6H5NO4                                        | NM      | NM      | NM      | NM         | NM         | NM         | NM         | NM         | NM         | 1.2E+07    |
| C7H7NO4                                        | 3.1E+06 | 2.8E+06 | 1.5E+06 | 6.7E+06    | NM         | NM         | NM         | NM         | NM         | 2.3E+07    |
| C7H8O3                                         | 1.8E+06 | NM      | 1.4E+06 | NM         |
| C14H18O2S                                      | NM      | NM      | NM      | NM         | NM         | NM         | NM         | NM         | NM         | NM         |
| C9H12O2                                        | 1.7E+06 | 1.4E+06 | NM      | NM         | NM         | NM         | NM         | NM         | NM         | 6.1E+06    |
| C11H10O3                                       | 2.1E+06 | 1.9E+06 | 1.7E+06 | NM         | NM         | NM         | NM         | NM         | NM         | 7.2E+06    |
| C10H10O3                                       | 8.8E+06 | 7.0E+06 | 4.5E+06 | 2.4E+07    | 1.8E+07    | NM         | NM         | NM         | NM         | 2.6E+07    |
| C8H10O3S                                       | NM      | 1.5E+06 | NM      | NM         | 4.8E+06    | NM         | NM         | NM         | NM         | 1.6E+07    |
| C12H18O4S                                      | NM      | NM      | NM      | 5.8E+06    | NM         | NM         | NM         | NM         | NM         | NM         |
| C12H18O5S                                      | NM      | NM      | NM      | NM         | NM         | NM         | NM         | NM         | NM         | 8.4E+06    |
| C17H18O5                                       | 2.6E+06 | 2.9E+06 | 1.8E+06 | 5.4E+06    | NM         | NM         | NM         | NM         | NM         | 1.0E+07    |
| C10H12O3                                       | 8.7E+06 | 6.3E+06 | 5.4E+06 | 2.1E+07    | 2.7E+07    | 5.0E+06    | NM         | NM         | NM         | 2.0E+07    |
| C12H10O2                                       | NM      | NM      | NM      | NM         | NM         | NM         | NM         | NM         | NM         | NM         |
| C11H14O5S                                      | 1.1E+07 | 6.5E+06 | 5.1E+06 | 1.4E+07    | 1.9E+07    | 5.9E+06    | NM         | NM         | NM         | 5.1E+07    |
| C15H20O6S                                      | NM      | NM      | NM      | 8.4E+06    | 6.4E+06    | NM         | NM         | NM         | NM         | NM         |
| C11H14O6S                                      | 1.6E+06 | NM      | NM      | NM         | NM         | NM         | NM         | NM         | NM         | 2.4E+07    |
| C14H18O4                                       | NM      | NM      | NM      | NM         | NM         | 5.2E+06    | NM         | NM         | NM         | NM         |
| C14H14O4                                       | NM      | 2.5E+06 | 1.1E+06 | 5.6E+06    | 6.1E+06    | NM         | NM         | NM         | NM         | 8.4E+06    |
| C10H18O4S                                      | NM      | NM      | NM      | NM         | NM         | NM         | NM         | NM         | NM         | NM         |
| C10H14O2                                       | 9.5E+06 | 1.6E+07 | 1.0E+07 | 5.8E+06    | 5.3E+06    | NM         | NM         | NM         | NM         | NM         |
| C16H16O4                                       | 1.7E+06 | 2.1E+06 | 1.7E+06 | NM         |
| C15H23N3O2                                     | NM      | NM      | NM      | NM         | NM         | NM         | NM         | NM         | NM         | NM         |

| Samples            | R8      | R9      | R10B    | 02/03/2019 | 15/03/2019 | 02/10/2019 | 22/10/2019 | 17/07/2020 | 03/11/2020 | 08/10/2020 |
|--------------------|---------|---------|---------|------------|------------|------------|------------|------------|------------|------------|
| <b>Amino acids</b> |         |         |         |            |            |            |            |            |            |            |
| C3H7NO2            | NM      | NM      | NM      | NM         | NM         | NM         | NM         | NM         | NM         | NM         |
| C6H14N4O2          | NM      | NM      | NM      | NM         | NM         | NM         | NM         | NM         | NM         | NM         |
| C4H8N2O3           | NM      | NM      | NM      | NM         | NM         | NM         | NM         | NM         | NM         | NM         |
| C4H7NO4            | NM      | NM      | NM      | NM         | NM         | NM         | NM         | NM         | NM         | NM         |
| C3H7NO2S           | NM      | NM      | NM      | NM         | NM         | NM         | NM         | NM         | NM         | NM         |
| C5H10N2O3          | NM      | NM      | NM      | NM         | NM         | NM         | NM         | NM         | NM         | NM         |
| C5H9NO4            | NM      | NM      | NM      | 6.3E+06    | 9.5E+06    | 4.3E+06    | NM         | NM         | NM         | 1.3E+07    |
| C2H5NO2            | NM      | NM      | NM      | NM         | NM         | NM         | NM         | NM         | NM         | NM         |
| C6H9N3O2           | NM      | NM      | NM      | NM         | 6.1E+06    | NM         | NM         | NM         | NM         | NM         |
| C6H13NO2           | NM      | NM      | NM      | 5.8E+06    | 4.9E+06    | 4.4E+06    | NM         | NM         | NM         | 5.9E+06    |
| C6H13NO2           | NM      | NM      | NM      | 5.8E+06    | 4.9E+06    | 4.4E+06    | NM         | NM         | NM         | 5.9E+06    |
| C6H14N2O2          | NM      | NM      | NM      | NM         | NM         | NM         | NM         | NM         | NM         | NM         |
| C5H11NO2S          | NM      | NM      | NM      | NM         | NM         | NM         | NM         | NM         | NM         | NM         |
| C9H11NO2           | NM      | NM      | NM      | 2.8E+07    | 1.7E+07    | 4.3E+06    | NM         | NM         | NM         | 5.7E+07    |
| C5H9NO2            | NM      | NM      | NM      | NM         | NM         | NM         | NM         | NM         | NM         | NM         |
| C3H7NO3            | NM      | NM      | NM      | NM         | NM         | NM         | NM         | NM         | NM         | NM         |
| C4H9NO3            | NM      | NM      | NM      | NM         | NM         | NM         | NM         | NM         | NM         | NM         |
| C11H12N2O2         | NM      | NM      | NM      | 5.1E+06    | NM         | NM         | NM         | NM         | NM         | 8.4E+06    |
| C9H11NO3           | 1.3E+07 | 4.6E+06 | 5.9E+06 | 2.5E+07    | 1.8E+07    | 1.3E+07    | 5.6E+06    | NM         | NM         | 2.6E+07    |
| C5H11NO2           | NM      | NM      | NM      | NM         | NM         | NM         | NM         | NM         | NM         | NM         |
| <b>Sugars</b>      |         |         |         |            |            |            |            |            |            |            |
| C5H12O5            | NM      | NM      | NM      | NM         | NM         | NM         | NM         | NM         | NM         | NM         |
| C5H10O5            | 5.7E+06 | 2.6E+06 | 3.7E+06 | 5.5E+06    | 6.2E+06    | NM         | NM         | NM         | NM         | 8.2E+06    |
| C5H12O5            | NM      | NM      | NM      | NM         | NM         | NM         | NM         | NM         | NM         | NM         |
| C4H10O4            | NM      | NM      | NM      | NM         | NM         | NM         | NM         | NM         | NM         | NM         |
| C4H8O4             | 9.7E+05 | NM      | NM      | NM         | NM         | NM         | NM         | NM         | NM         | NM         |
| C6H12O6            | NM      | NM      | NM      | 1.3E+07    | 9.6E+06    | 4.0E+07    | NM         | 1.3E+07    | NM         | 1.2E+07    |
| C6H14O6            | NM      | NM      | NM      | NM         | NM         | NM         | NM         | NM         | NM         | NM         |
| C6H10O5            | 6.5E+07 | 3.0E+07 | 4.1E+07 | NM         | NM         | 3.3E+07    | NM         | NM         | NM         | NM         |
| C6H12O6            | NM      | NM      | NM      | 1.3E+07    | 9.6E+06    | 4.0E+07    | NM         | 1.3E+07    | NM         | 1.2E+07    |
| C6H12O6            | NM      | NM      | NM      | 1.3E+07    | 9.6E+06    | 4.0E+07    | NM         | 1.3E+07    | NM         | 1.2E+07    |
| C6H12O6            | NM      | NM      | NM      | 1.3E+07    | 9.6E+06    | 4.0E+07    | NM         | 1.3E+07    | NM         | 1.2E+07    |
| C12H22O11          | NM      | NM      | NM      | NM         | NM         | NM         | NM         | NM         | NM         | NM         |
| C6H10O5            | 6.5E+07 | 3.0E+07 | 4.1E+07 | NM         | NM         | 3.3E+07    | NM         | NM         | NM         | NM         |
| C12H24O11          | NM      | NM      | NM      | NM         | NM         | NM         | NM         | NM         | NM         | NM         |
| C12H22O11          | NM      | NM      | NM      | NM         | NM         | NM         | NM         | NM         | NM         | NM         |
| C6H14O6            | NM      | NM      | NM      | NM         | NM         | NM         | NM         | NM         | NM         | NM         |
| C6H10O5            | 6.5E+07 | 3.0E+07 | 4.1E+07 | NM         | NM         | 3.3E+07    | NM         | NM         | NM         | NM         |
| C6H12O6            | NM      | NM      | NM      | 1.3E+07    | 9.6E+06    | 4.0E+07    | NM         | 1.3E+07    | NM         | 1.2E+07    |
| C18H32O16          | NM      | NM      | NM      | NM         | 1.4E+07    | NM         | NM         | NM         | NM         | NM         |
| C6H12O5            | 2.5E+07 | 9.9E+06 | 1.3E+07 | 1.2E+07    | 1.4E+07    | 7.2E+06    | NM         | 6.5E+06    | NM         | 4.7E+07    |

| Samples   | R8      | R9      | R10B    | 02/03/2019 | 15/03/2019 | 02/10/2019 | 22/10/2019 | 17/07/2020 | 03/11/2020 | 08/10/2020 |
|-----------|---------|---------|---------|------------|------------|------------|------------|------------|------------|------------|
| C5H10O5   | 5.7E+06 | 2.6E+06 | 3.7E+06 | 5.5E+06    | 6.2E+06    | NM         | NM         | NM         | NM         | 8.2E+06    |
| C7H12O6   | NM      | NM      | NM      | NM         | NM         | 1.9E+07    | NM         | NM         | NM         | NM         |
| C6H14O6   | NM      | NM      | NM      | NM         | NM         | NM         | NM         | NM         | NM         | NM         |
| C12H22O11 | NM      | NM      | NM      | NM         | NM         | NM         | NM         | NM         | NM         | NM         |
| C4H10O4   | NM      | NM      | NM      | NM         | NM         | NM         | NM         | NM         | NM         | NM         |
| C12H22O11 | NM      | NM      | NM      | NM         | NM         | NM         | NM         | NM         | NM         | NM         |
| C5H12O5   | NM      | NM      | NM      | NM         | NM         | NM         | NM         | NM         | NM         | NM         |
| C5H10O5   | 5.7E+06 | 2.6E+06 | 3.7E+06 | 5.5E+06    | 6.2E+06    | NM         | NM         | NM         | NM         | 8.2E+06    |
| C5H12O4   | NM      | NM      | NM      | NM         | NM         | NM         | NM         | NM         | NM         | NM         |
| C3H8O3    | NM      | NM      | NM      | NM         | NM         | NM         | NM         | NM         | NM         | NM         |

**Table S5:** Table of loadings, showing the correlation between the first six PCs and the samples (loadings). Color varies from blue (-1) to red (+1), with 0 represented in white.

|                   | <b>PC1</b> | <b>PC2</b> | <b>PC3</b> | <b>PC4</b> | <b>PC5</b> | <b>PC6</b> |
|-------------------|------------|------------|------------|------------|------------|------------|
| <b>R8</b>         | 0.51       | -0.21      | -0.01      | -0.03      | -0.02      | 0.01       |
| <b>R9</b>         | 0.50       | -0.24      | 0.02       | -0.14      | -0.10      | 0.09       |
| <b>R10B</b>       | 0.51       | -0.24      | 0.01       | -0.13      | -0.12      | 0.10       |
| <b>02/03/2019</b> | 0.06       | 0.10       | 0.73       | 0.33       | 0.04       | 0.45       |
| <b>15/03/2019</b> | 0.15       | 0.26       | 0.57       | -0.01      | -0.06      | -0.47      |
| <b>02/10/2019</b> | 0.29       | 0.04       | -0.20      | 0.64       | 0.61       | -0.28      |
| <b>22/10/2019</b> | 0.13       | 0.40       | -0.14      | -0.21      | 0.41       | 0.62       |
| <b>17/07/2020</b> | 0.20       | 0.46       | -0.22      | 0.24       | -0.46      | -0.03      |
| <b>03/11/2020</b> | 0.20       | 0.51       | -0.17      | 0.10       | -0.30      | 0.03       |
| <b>08/10/2021</b> | 0.15       | 0.36       | 0.10       | -0.58      | 0.36       | -0.32      |

**Figure S1:** Back trajectory plots on 12 h of the air masses corresponding to R8, R9 and R10B, computed with Meso-CAT, resulting from the coupling between high-resolution Meso-NH simulations and the lagrangian tool CAT and back trajectory plots on 72 h of the air masses corresponding to PUY samples using the lagrangian tool CAT.

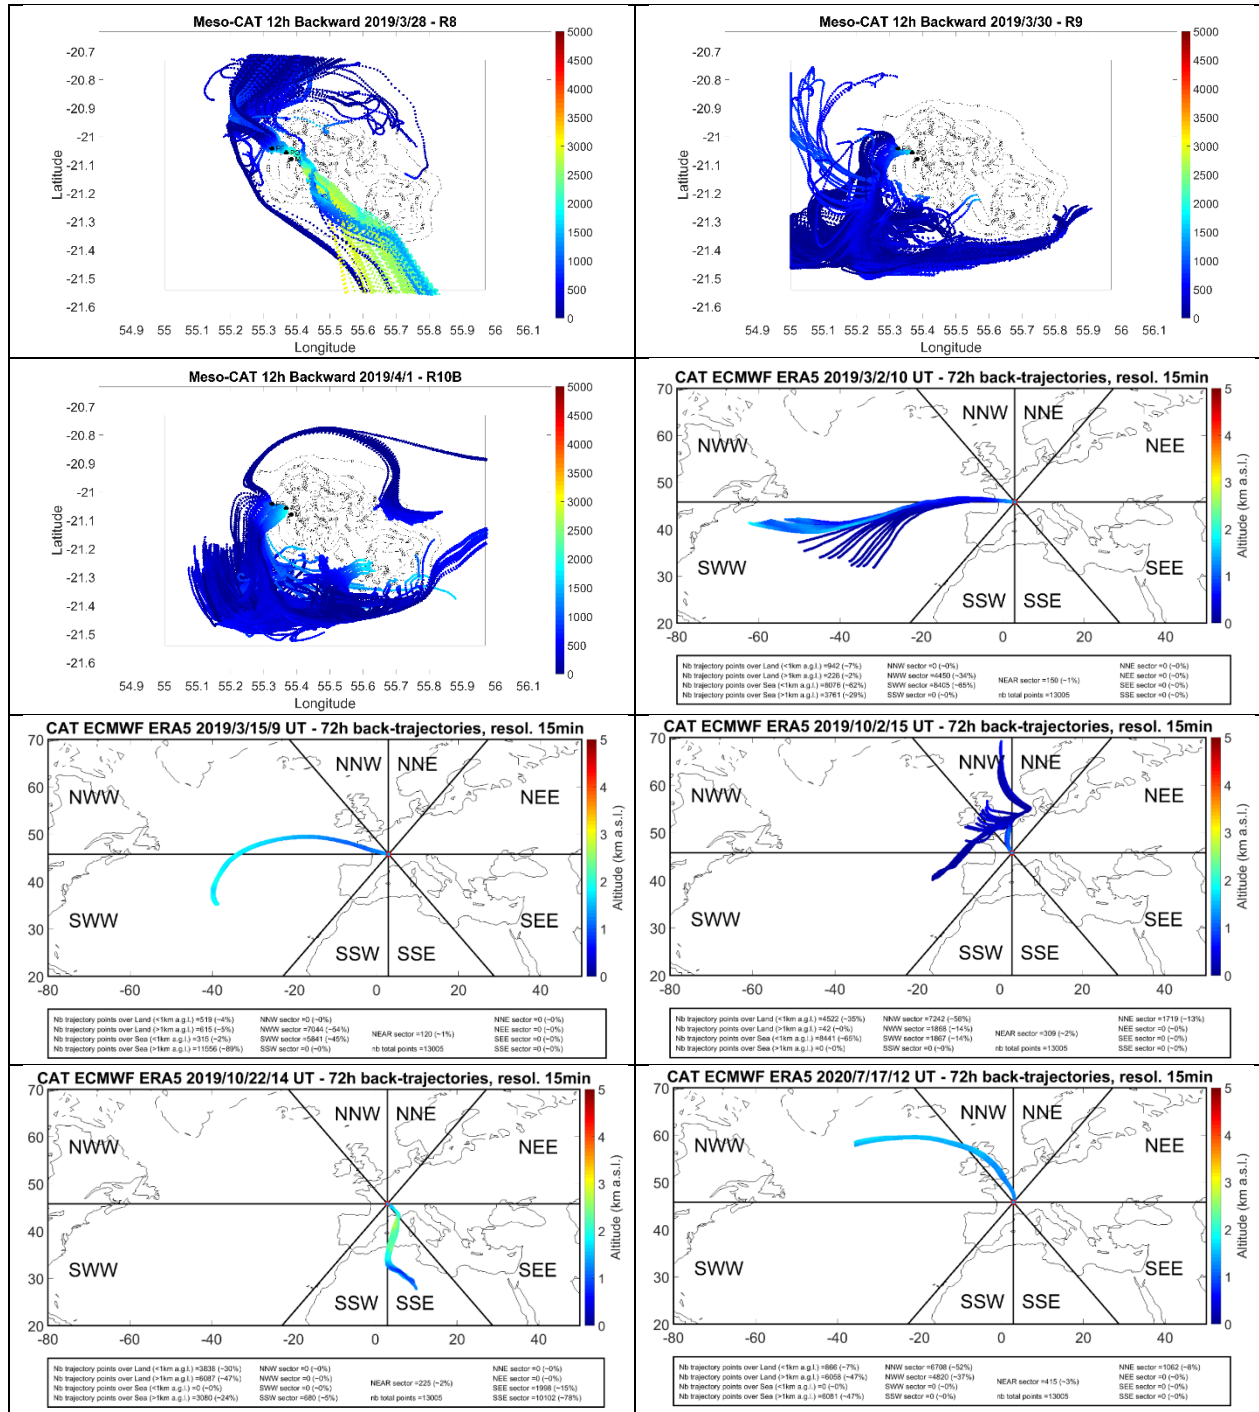



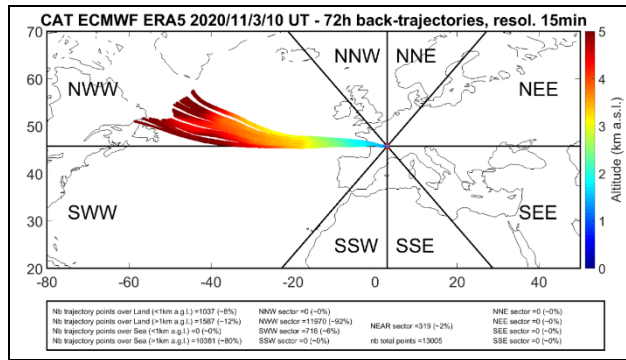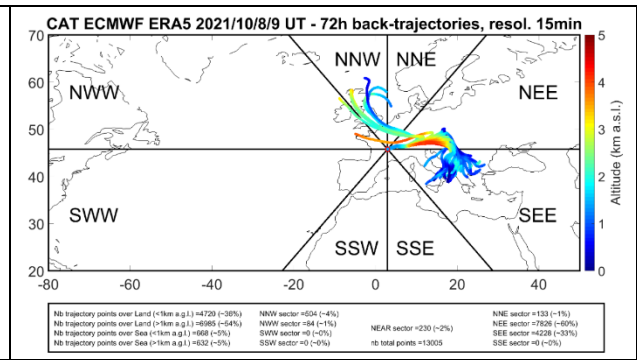

**Figure S2:** Correlation between the number of MFs and the DOC concentration in cloud water samples presented in this work and in Zhao et al., 2013; Cook et al., 2018; Sun et al., 2023; Bianco et. al., 2018; Bianco et al., 2019.

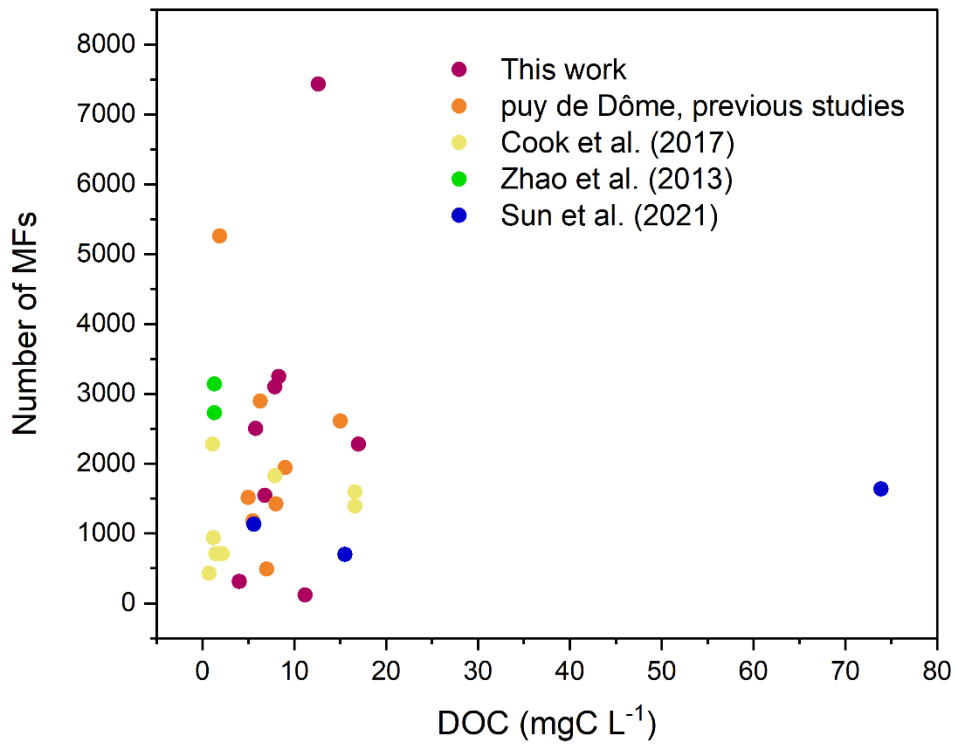

**Figure S3:** a) Comparison of the number of carbons (#C), of hydrogen (#H), of oxygen (#O), of nitrogen (#N) and of sulphur (#S), the DBE, the elemental ratios (oxygen to carbon (O/C), hydrogen to carbon (H/C), nitrogen to carbon (N/C) and sulphur to carbon (S/C)), the carbon oxidation state (OSC), the aromaticity index (AI) and the CHO Index for all the molecular formula presented in samples collected at PUY, in blue, and at REU, in yellow. b), c), d) e) and f) similarly to a), for all the CHO, CHNO, CHOS, CHNOS, and CHOSP compounds, respectively.

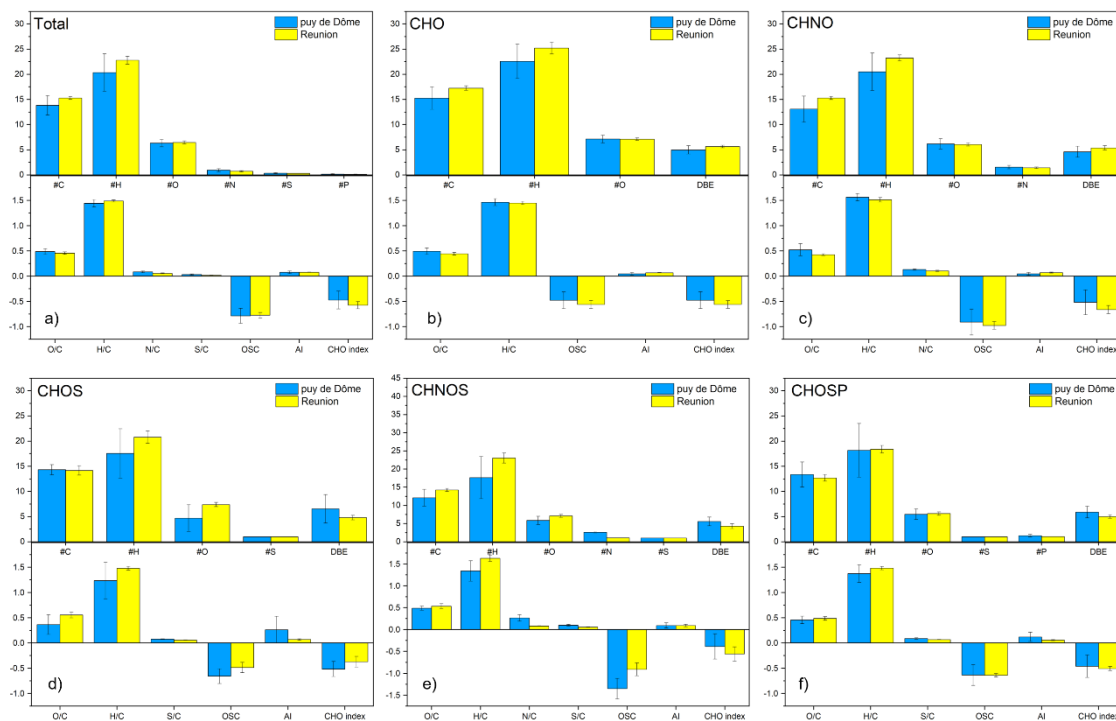

**Figure S4:** Results of the ANOVA test used to investigate the differences of OSC between PUY and REU samples. The y-axis reports the pair of samples and the color depicts if the difference is significant (red) or not (black).

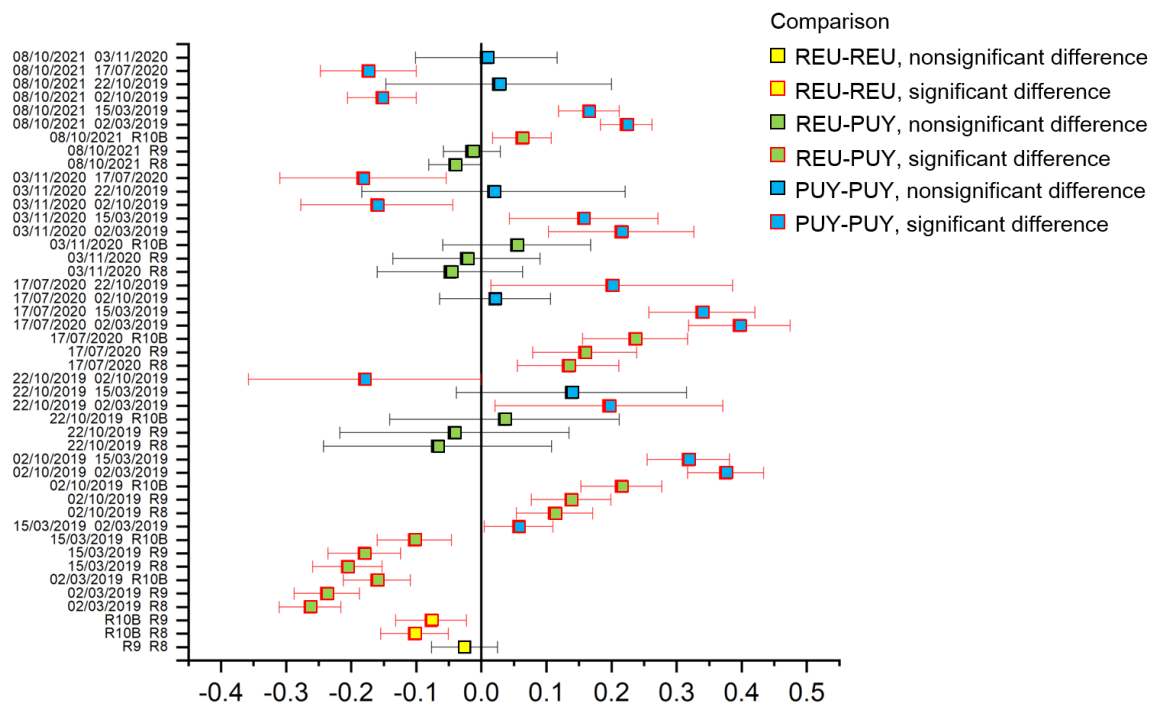

**Figure S5:** Average OSC for samples collected at PUY (blue) and REU (yellow) for CHO, CHNO, CHOS and CHNOS compounds.

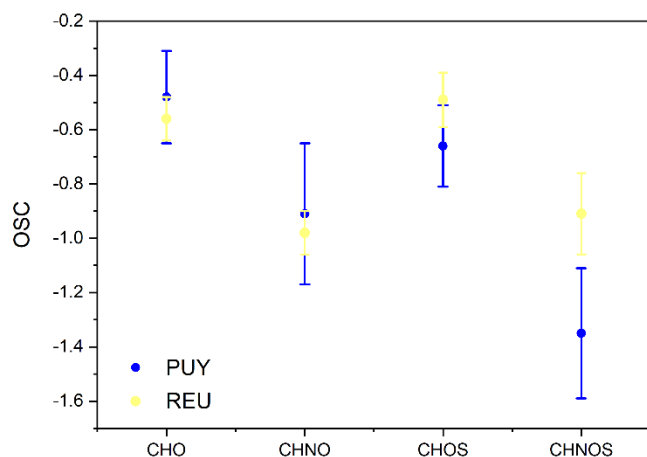

**Figure S6:** Bubble plot of the OSC – nC space for samples collected at PUY (02/03/2019, 15/03/2019 and 17/07/2020). The intensity of the bubble is proportional to the intensity of the mass signal for all the formulas with the same OSC, normalized by the highest intensity of the mass spectrum.

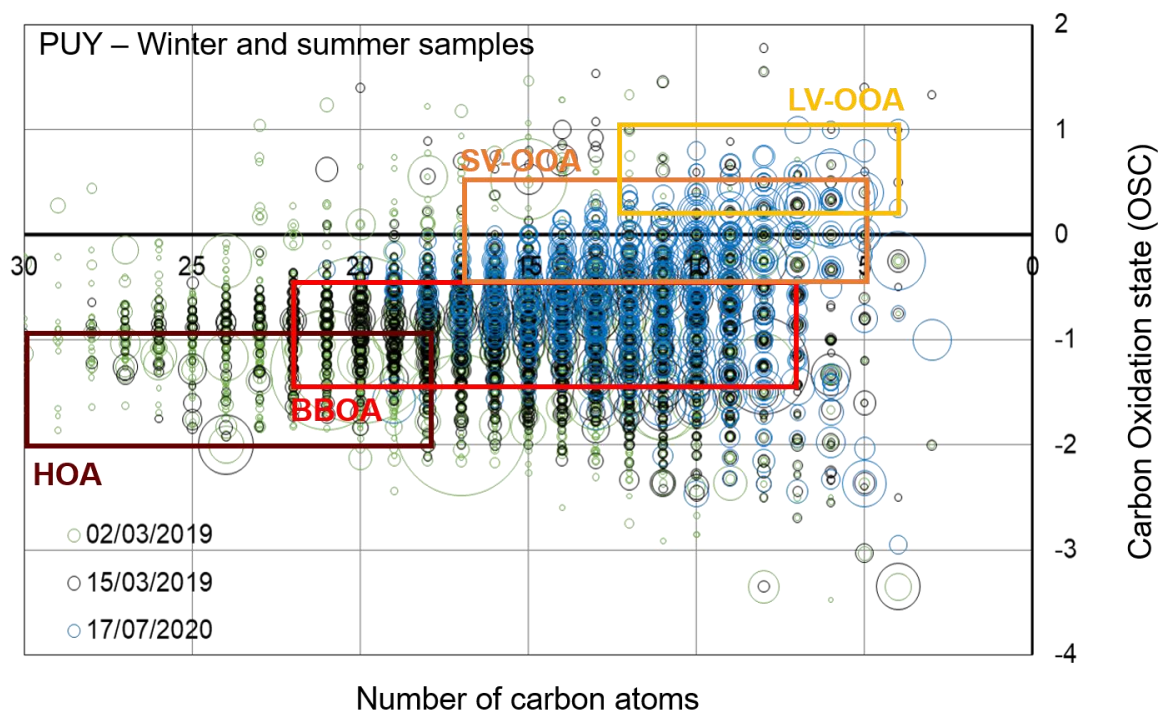

**Figure S7:** Stacked histogram of the relative contribution (in %) of the Rivas-Ubach categories for samples collected at REU and PUY.

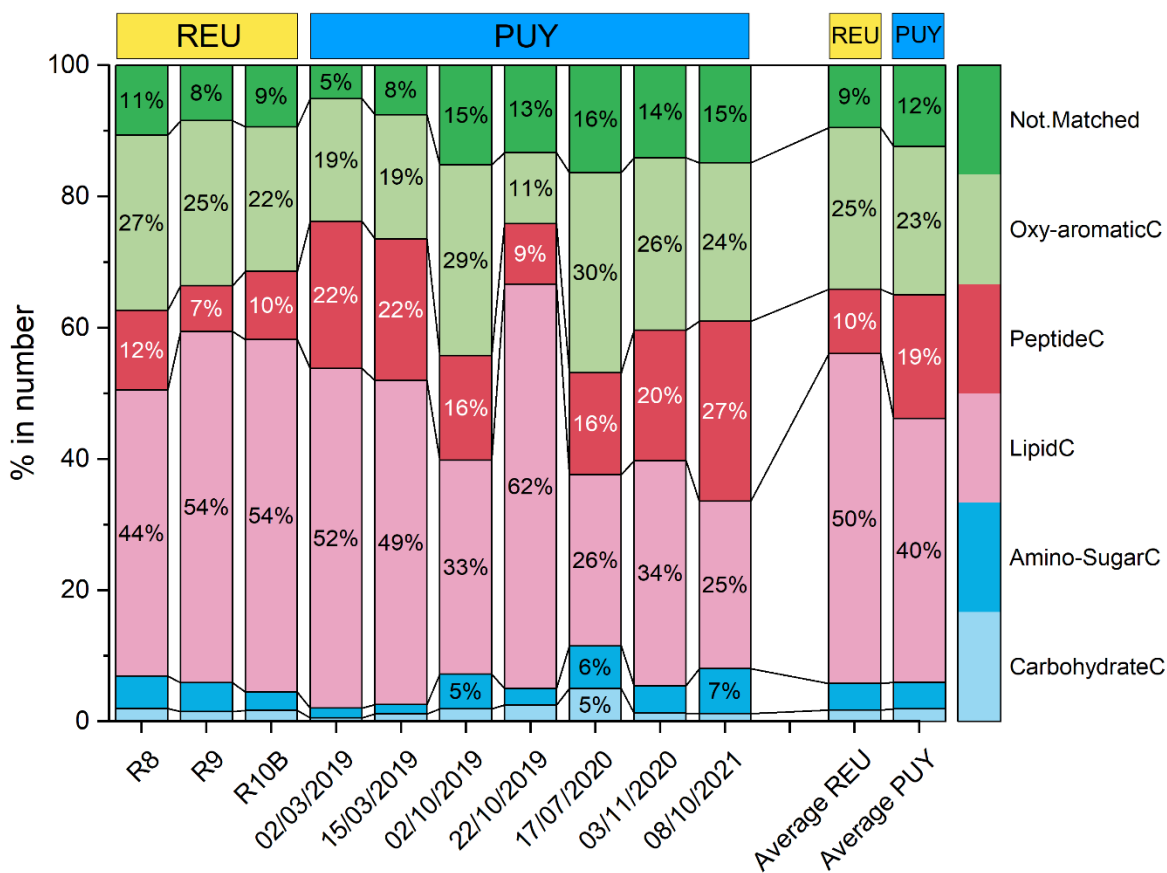

**Figure S8:** stacked histogram of the first three PCs, explaining 63% of the total variance, to the representation of the loadings.

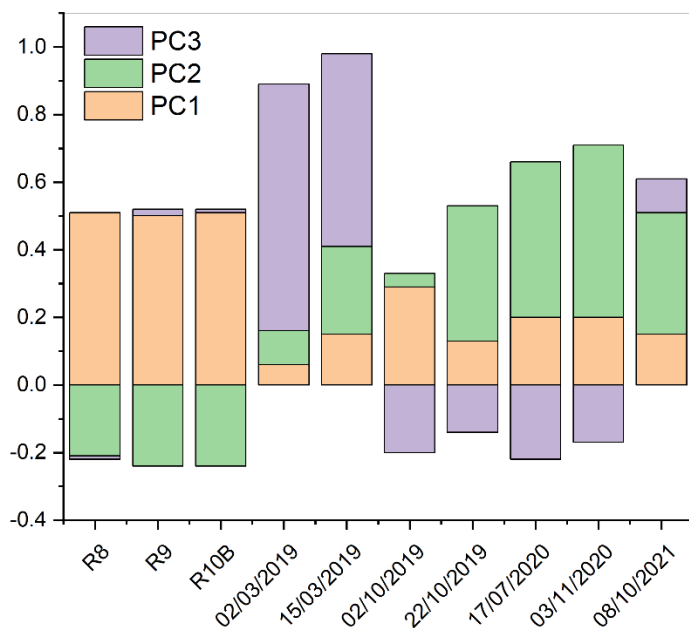

## References

Kroll, J. H., Donahue, N. M., Jimenez, J. L., Kessler, S. H., Canagaratna, M. R., Wilson, K. R., Altieri, K. E., Mazzoleni, L. R., Wozniak, A. S., Bluhm, H., Mysak, E. R., Smith, J. D., Kolb, C. E., and Worsnop, D. R.: Carbon oxidation state as a metric for describing the chemistry of atmospheric organic aerosol, *Nature Chemistry*, 3, 133–139, <https://doi.org/10.1038/nchem.948>, 2011.

Melendez-Perez, J. J., Martínez-Mejía, M. J., and Eberlin, M. N.: A reformulated aromaticity index equation under consideration for non-aromatic and non-condensed aromatic cyclic carbonyl compounds, *Organic Geochemistry*, 95, 29–33, <https://doi.org/10.1016/j.orggeochem.2016.02.002>, 2016.
